# Supplementary material
Source: PubMed Central journal article supplement (PMC6434936)
Supplement: NIHMS1017317-supplement-1.pdf [file NIHMS1017317-supplement-1.pdf]

### Supplemental Figure 1. Medical Care Costs by Percentile Ranking

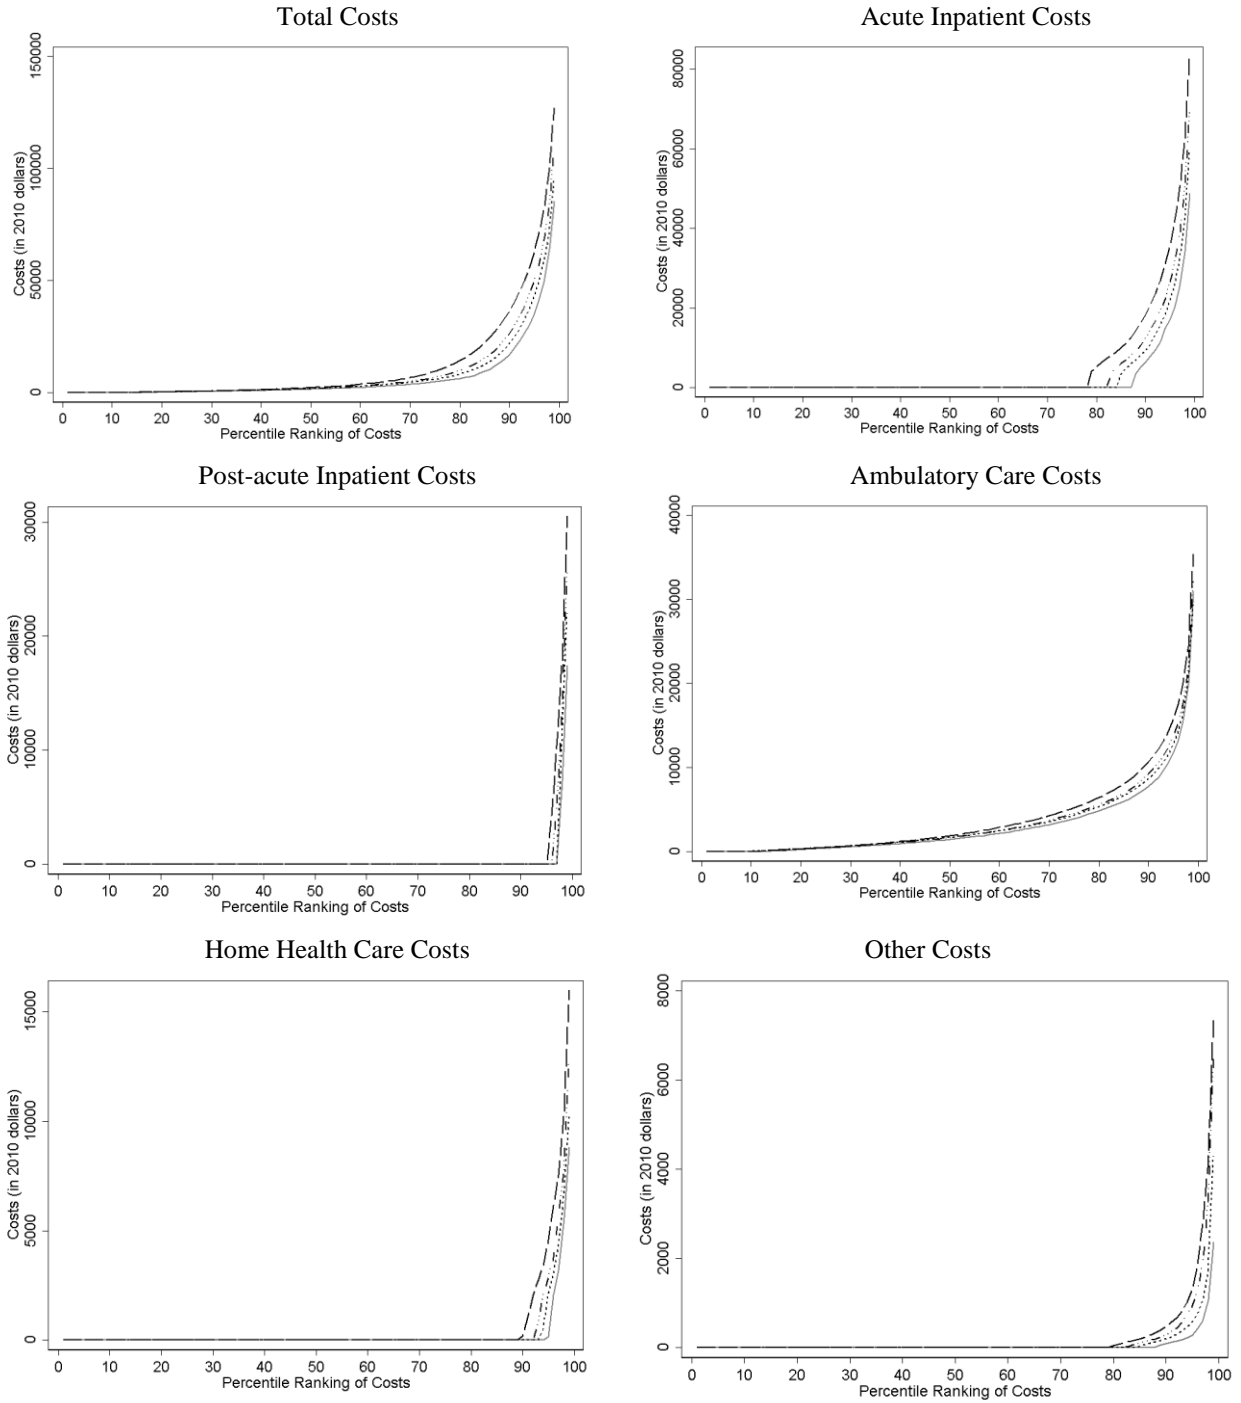

|                 |                              |
|-----------------|------------------------------|
| — All Favorable | ..... 1+ Elevated, Zero High |
| - · - 1 High    | - - - 2+ High                |

Notes: Plots shows the medical care costs (unadjusted) at each percentile from 0<sup>th</sup> to 99<sup>th</sup> percentile by CVH strata.

**SUPPLEMENTAL TABLES**

**Supplemental Table 1.**

**Differences in Annual Medicare Care Utilization Per Person between Less Favorable CVH and All Favorable by Whether the Primary Reason for Admission/Visit is CVD or Non-CVD  
(N = 158,306)**

|                                             | Acute Inpatient Admission           |                               | Acute Inpatient Length of Stay |                               | Post-acute Inpatient Admissions  |                                 |
|---------------------------------------------|-------------------------------------|-------------------------------|--------------------------------|-------------------------------|----------------------------------|---------------------------------|
|                                             | CVD                                 | Non-CVD                       | CVD                            | Non-CVD                       | CVD                              | Non-CVD                         |
| All Favorable (ref. mean)                   | 0.02                                | 0.17                          | 0.08                           | 0.83                          | 0.001                            | 0.03                            |
| <b>Marginal effect from ref.; Mean [SE]</b> |                                     |                               |                                |                               |                                  |                                 |
| 1+ Elevated, None High                      | 0.02 <sup>***</sup><br>(0.006)      | 0.02 <sup>**</sup><br>(0.01)  | 0.14 <sup>***</sup><br>(0.03)  | 0.19 <sup>**</sup><br>(0.08)  | 0.002 <sup>***</sup><br>(0.0007) | 0.004<br>(0.003)                |
| 1 High                                      | 0.03 <sup>***</sup><br>(0.005)      | 0.06 <sup>***</sup><br>(0.01) | 0.21 <sup>***</sup><br>(0.03)  | 0.45 <sup>***</sup><br>(0.08) | 0.002 <sup>***</sup><br>(0.0007) | 0.009 <sup>***</sup><br>(0.002) |
| 2 + High                                    | 0.05 <sup>***</sup><br>(0.005)      | 0.10 <sup>***</sup><br>(0.01) | 0.32 <sup>***</sup><br>(0.03)  | 0.73 <sup>***</sup><br>(0.08) | 0.003 <sup>***</sup><br>(0.0007) | 0.017 <sup>***</sup><br>(0.003) |
|                                             | Post-acute Inpatient Length of Stay |                               | Ambulatory Care Visits         |                               | Home Health Visits               |                                 |
|                                             | CVD                                 | Non-CVD                       | CVD                            | Non-CVD                       | CVD                              | Non-CVD                         |
| All Favorable (ref. mean)                   | 0.04                                | 0.93                          | 0.58                           | 13.99                         | 0.10                             | 1.31                            |
| <b>Marginal effect from ref.; Mean [SE]</b> |                                     |                               |                                |                               |                                  |                                 |
| 1+ Elevated, None High                      | 0.04 <sup>**</sup><br>(0.02)        | 0.11<br>(0.11)                | 0.42 <sup>***</sup><br>(0.09)  | 0.60<br>(0.42)                | 0.13 <sup>***</sup><br>(0.05)    | 0.47 <sup>**</sup><br>(0.21)    |
| 1 High                                      | 0.06 <sup>***</sup><br>(0.02)       | 0.21 <sup>**</sup><br>(0.10)  | 0.67 <sup>***</sup><br>(0.09)  | 0.96 <sup>**</sup><br>(0.40)  | 0.21 <sup>***</sup><br>(0.05)    | 0.72 <sup>***</sup><br>(0.19)   |
| 2 + High                                    | 0.08 <sup>***</sup><br>(0.02)       | 0.47 <sup>***</sup><br>(0.11) | 1.13 <sup>***</sup><br>(0.09)  | 2.08 <sup>***</sup><br>(0.41) | 0.32 <sup>***</sup><br>(0.05)    | 1.40 <sup>***</sup><br>(0.20)   |

Notes: Each column is from a separate regression. The sample size for each regression is 158,306. Coefficients (marginal effects calculated at the mean of covariates) and cluster-robust standard errors (in parenthesis) are reported in cells. The coefficients represent the per person difference in the dependent variable between less favorable CVH strata and all favorable strata. All regressions also control for age at follow-up, state of residence, year, baseline age, race, sex, baseline education, and whether the participant died during the year. \*\* p<0.05; \*\*\* p<0.01

**Supplemental Table 2.**  
**The Association between Costs and CVH by Sex: P-values on the Interaction Term between CVH and Female Indicator Variable**  
**(N = 158,306)**

|                                   | Quantiles Regressions |       |        |        |        | GLM   |
|-----------------------------------|-----------------------|-------|--------|--------|--------|-------|
|                                   | Q25                   | Q50   | Q75    | Q90    | Q95    |       |
| <i>Total Costs</i>                |                       |       |        |        |        |       |
| All Favorable                     | Ref.                  | Ref.  | Ref.   | Ref.   | Ref.   | Ref.  |
| 1+ Elevated, None High            | 0.459                 | 0.774 | 0.501  | 0.100  | 0.136  | 0.758 |
| 1 High                            | 0.096                 | 0.289 | 0.164  | 0.113  | 0.195  | 0.762 |
| 2 + High                          | 0.008                 | 0.020 | 0.016  | 0.074  | 0.366  | 0.863 |
| <i>CVD-related Costs</i>          |                       |       |        |        |        |       |
| All Favorable                     | Ref.                  | Ref.  | Ref.   | Ref.   | Ref.   | Ref.  |
| 1+ Elevated, None High            | -                     | -     | 0.277  | 0.017  | 0.009  | 0.021 |
| 1 High                            | -                     | -     | <0.001 | <0.001 | <0.001 | 0.045 |
| 2 + High                          | -                     | -     | <0.001 | <0.001 | <0.001 | 0.012 |
| <i>Non-CVD-related Costs</i>      |                       |       |        |        |        |       |
| All Favorable                     | Ref.                  | Ref.  | Ref.   | Ref.   | Ref.   | Ref.  |
| 1+ Elevated, None High            | 0.471                 | 0.740 | 0.658  | 0.412  | 0.080  | 0.586 |
| 1 High                            | 0.148                 | 0.417 | 0.495  | 0.933  | 0.584  | 0.811 |
| 2 + High                          | 0.020                 | 0.047 | 0.254  | 0.684  | 0.886  | 0.938 |
| <i>Acute Inpatient Costs</i>      |                       |       |        |        |        |       |
| All Favorable                     | Ref.                  | Ref.  | Ref.   | Ref.   | Ref.   | Ref.  |
| 1 Elevated, None High             | -                     | -     | -      | 0.192  | 0.030  | 0.913 |
| 1 High                            | -                     | -     | -      | 0.005  | 0.017  | 0.937 |
| 2 + High                          | -                     | -     | -      | 0.004  | 0.009  | 0.959 |
| <i>Post-acute Inpatient Costs</i> |                       |       |        |        |        |       |
| All Favorable                     | Ref.                  | Ref.  | Ref.   | Ref.   | Ref.   | Ref.  |
| 1+ Elevated, None High            | -                     | -     | -      | -      | 0.695  | 0.838 |
| 1 High                            | -                     | -     | -      | -      | 0.595  | 0.979 |
| 2 + High                          | -                     | -     | -      | -      | 0.001  | 0.812 |
| <i>Ambulatory Care Costs</i>      |                       |       |        |        |        |       |
| All Favorable                     | Ref.                  | Ref.  | Ref.   | Ref.   | Ref.   | Ref.  |
| 1+ Elevated, None High            | 0.438                 | 0.660 | 0.307  | 0.596  | 0.693  | 0.597 |
| 1 High                            | 0.122                 | 0.190 | 0.122  | 0.249  | 0.697  | 0.389 |
| 2 + High                          | 0.011                 | 0.015 | 0.007  | 0.016  | 0.155  | 0.184 |
| <i>Home Health Costs</i>          |                       |       |        |        |        |       |
| All Favorable                     | Ref.                  | Ref.  | Ref.   | Ref.   | Ref.   | Ref.  |
| 1+ Elevated, None High            | -                     | -     | -      | 0.688  | 0.485  | 0.683 |
| 1 High                            | -                     | -     | -      | 0.476  | 0.476  | 0.782 |
| 2 + High                          | -                     | -     | -      | 0.040  | <0.001 | 0.752 |
| <i>Other Costs</i>                |                       |       |        |        |        |       |
| All Favorable                     | Ref.                  | Ref.  |        | Ref.   | Ref.   | Ref.  |
| 1+ Elevated, None High            | -                     | -     | -      | 0.705  | 0.951  | 0.323 |
| 1 High                            | -                     | -     | -      | 0.952  | 0.467  | 0.041 |
| 2 + High                          | -                     | -     | -      | 0.200  | 0.939  | 0.155 |

Notes: Values in cells are the p-values on the interaction term between CVH strata and female indicator variable from separate models in which the interaction term is include. All regressions also control for age at follow-up, state of residence, year, baseline age, race, sex, baseline education, and whether the participant died during the year.

**Supplemental Table 3.**  
**Differences in Annual Medical Care Costs between Less Favorable CVH and All Favorable Stratified by Sex**

|                                             | Quantiles Regressions |     |                |                   |                      | GLM              |
|---------------------------------------------|-----------------------|-----|----------------|-------------------|----------------------|------------------|
|                                             | Q25                   | Q50 | Q75            | Q90               | Q95                  | Mean             |
| <i>Panel A: CVD-related Costs</i>           |                       |     |                |                   |                      |                  |
| <i>Men</i>                                  |                       |     |                |                   |                      |                  |
| All Favorable (ref., \$)                    | 0                     | 0   | 0              | 661               | 1,569                | 1,036            |
| <b>Marginal effect from ref.; Mean [SE]</b> |                       |     |                |                   |                      |                  |
| 1+ Elevated, None High                      | -                     | -   | 6<br>(4)       | 80<br>(50)        | 218<br>(138)         | 263<br>(386)     |
| 1 High                                      | -                     | -   | 20***<br>(5)   | 392***<br>(65)    | 1,317***<br>(285)    | 883**<br>(381)   |
| 2 + High                                    | -                     | -   | 234***<br>(20) | 1,455***<br>(129) | 8,457***<br>(748)    | 1552***<br>(375) |
| <i>Women</i>                                |                       |     |                |                   |                      |                  |
| All Favorable (ref., \$)                    | 0                     | 0   | 0              | 200               | 871                  | 390              |
| <b>Marginal effect from ref.; Mean [SE]</b> |                       |     |                |                   |                      |                  |
| 1+ Elevated, None High                      | -                     | -   | 2***<br>(1)    | 50***<br>(18)     | 284***<br>(106)      | 828***<br>(183)  |
| 1 High                                      | -                     | -   | 2***<br>(1)    | 91***<br>(28)     | 321***<br>(89)       | 1047***<br>(168) |
| 2 + High                                    | -                     | -   | 101***<br>(18) | 825***<br>(104)   | 5,557***<br>(701)    | 1581***<br>(169) |
| <i>Panel B: Acute Inpatient Costs</i>       |                       |     |                |                   |                      |                  |
| <i>Men</i>                                  |                       |     |                |                   |                      |                  |
| All Favorable (ref., \$)                    | 0                     | 0   | 0              | 6,793             | 18,099               | 2,946            |
| <b>Marginal effect from ref.; Mean [SE]</b> |                       |     |                |                   |                      |                  |
| 1+ Elevated, None High                      | -                     | -   | -              | 741<br>(430)      | 4,738***<br>(1,635)  | 839<br>(504)     |
| 1 High                                      | -                     | -   | -              | 2,840***<br>(559) | 8,445***<br>(1,598)  | 1646***<br>(495) |
| 2 + High                                    | -                     | -   | -              | 8,408***<br>(736) | 15,770***<br>(1,675) | 2821***<br>(490) |
| <i>Women</i>                                |                       |     |                |                   |                      |                  |
| All Favorable (ref., \$)                    | 0                     | 0   | 0              | 6,174             | 16,539               | 2,416            |
| <b>Marginal effect from ref.; Mean [SE]</b> |                       |     |                |                   |                      |                  |
| 1 Elevated, None High                       | -                     | -   | -              | 744<br>(466)      | 2,284<br>(1,402)     | 745**<br>(307)   |
| 1 High                                      | -                     | -   | -              | 2,338***<br>(631) | 5,845***<br>(1,265)  | 1454***<br>(289) |
| 2 + High                                    | -                     | -   | -              | 7,175***<br>(857) | 12,873***<br>(1,398) | 2631***<br>(292) |

Notes: Coefficients (cluster-robust standard errors in parenthesis) are obtained from quantile regressions. Each column by outcome is one regression. Sample size is 88,627 for men and 69,679 for women. All regressions also control for age at follow-up, state of residence, year, baseline age, race, sex, baseline education, and whether the participant died during the year. \*\* p<0.05; \*\*\* p<0.01

**Supplemental Table 4a.**  
**Survivors and Decedents: Differences in Annual Medical Care Utilization between Less Favorable CVH and All Favorable**

| <i>Panel A: Survivors</i><br>( <i>N = 96,909</i> ) |                               |                               |                                 |                               |                               |                               |
|----------------------------------------------------|-------------------------------|-------------------------------|---------------------------------|-------------------------------|-------------------------------|-------------------------------|
|                                                    | Acute Inpatient               |                               | Post-acute Inpatient            |                               | Ambulatory Care               | Home Health                   |
|                                                    | No. of Admissions             | Length of Stay                | No. of Admissions               | Length of Stay                | No. of Visits                 | No. of Visits                 |
| All Favorable (ref. mean)                          | 0.15                          | 0.62                          | 0.02                            | 0.62                          | 14.07                         | 1.05                          |
| <b>Marginal effect from ref.; Mean [SE]</b>        |                               |                               |                                 |                               |                               |                               |
| 1+ Elevated, None High                             | 0.03 <sup>***</sup><br>(0.01) | 0.20 <sup>***</sup><br>(0.06) | 0.003<br>(0.002)                | 0.14 <sup>***</sup><br>(0.05) | 0.73<br>(0.48)                | 0.34 <sup>***</sup><br>(0.12) |
| 1 High                                             | 0.05 <sup>***</sup><br>(0.01) | 0.31 <sup>***</sup><br>(0.06) | 0.005 <sup>***</sup><br>(0.002) | 0.20 <sup>***</sup><br>(0.05) | 0.97 <sup>**</sup><br>(0.47)  | 0.38 <sup>***</sup><br>(0.10) |
| 2 + High                                           | 0.09 <sup>***</sup><br>(0.01) | 0.52 <sup>***</sup><br>(0.06) | 0.010 <sup>***</sup><br>(0.002) | 0.33 <sup>***</sup><br>(0.05) | 2.40 <sup>***</sup><br>(0.49) | 0.66 <sup>***</sup><br>(0.11) |
| <i>Panel B: Decedents</i><br>( <i>N = 61,397</i> ) |                               |                               |                                 |                               |                               |                               |
|                                                    | Acute Inpatient               |                               | Post-acute Inpatient            |                               | Ambulatory Care               | Home Health                   |
|                                                    | No. of Admissions             | Length of Stay                | No. of Admissions               | Length of Stay                | No. of Visits                 | No. of Visits                 |
| All Favorable (ref. mean)                          | 0.36                          | 2.03                          | 0.08                            | 2.36                          | 16.52                         | 2.82                          |
| <b>Marginal effect from ref.; Mean [SE]</b>        |                               |                               |                                 |                               |                               |                               |
| 1+ Elevated, None High                             | 0.03<br>(0.03)                | 0.29<br>(0.26)                | 0.005<br>(0.007)                | 0.15<br>(0.28)                | 1.45<br>(0.94)                | 0.59<br>(0.90)                |
| 1 High                                             | 0.08 <sup>***</sup><br>(0.03) | 0.66 <sup>***</sup><br>(0.25) | 0.009<br>(0.007)                | 0.08<br>(0.26)                | 1.46<br>(0.91)                | 1.22<br>(0.85)                |
| 2 + High                                           | 0.15 <sup>***</sup><br>(0.03) | 1.08 <sup>***</sup><br>(0.24) | 0.018 <sup>***</sup><br>(0.007) | 0.32<br>(0.26)                | 2.46 <sup>***</sup><br>(0.91) | 2.58 <sup>***</sup><br>(0.85) |

Notes: Coefficients (marginal effects calculated at the mean of covariates) and cluster-robust standard errors (in parenthesis) are reported in cells. All regressions also control for age at follow-up, state of residence, year, baseline age, race, sex, baseline education, and whether the participant died during the year. \*\* p<0.05; \*\*\* p<0.01

**Supplemental Table 4b.**  
**Survivors and Decedents: Differences in Annual Medical Care Cost between Less Favorable CVH and All Favorable**

| <i>Panel A: Survivors</i><br>(N = 96,909)   |                            |                             |                              |                                |                                |                               |
|---------------------------------------------|----------------------------|-----------------------------|------------------------------|--------------------------------|--------------------------------|-------------------------------|
|                                             | Q25                        | Q50                         | Q75                          | Q90                            | Q95                            | Mean                          |
| All Favorable (ref., \$)                    | 402                        | 1,478                       | 4,359                        | 13,678                         | 29,334                         | 5,847                         |
| <b>Marginal effect from ref.; Mean [SE]</b> |                            |                             |                              |                                |                                |                               |
| 1+ Elevated, None High                      | 88 <sup>***</sup><br>(31)  | 201 <sup>***</sup><br>(74)  | 403 <sup>**</sup><br>(178)   | 832<br>(685)                   | 1978<br>(1440)                 | 753 <sup>**</sup><br>(370)    |
| 1 High                                      | 81 <sup>***</sup><br>(30)  | 243 <sup>***</sup><br>(71)  | 607 <sup>***</sup><br>(175)  | 2004 <sup>***</sup><br>(701)   | 4999 <sup>***</sup><br>(1505)  | 1265 <sup>***</sup><br>(355)  |
| 2 + High                                    | 173 <sup>***</sup><br>(34) | 510 <sup>***</sup><br>(79)  | 1565 <sup>***</sup><br>(219) | 6791 <sup>***</sup><br>(878)   | 13104 <sup>***</sup><br>(1910) | 2668 <sup>***</sup><br>(369)  |
| <i>Panel B: Decedents</i><br>(N = 61,397)   |                            |                             |                              |                                |                                |                               |
|                                             | Q25                        | Q50                         | Q75                          | Q90                            | Q95                            | Mean                          |
| All Favorable (ref., \$)                    | 492                        | 1,849                       | 7,935                        | 33,234                         | 59,370                         | 11,027                        |
| <b>Marginal effect from ref.; Mean [SE]</b> |                            |                             |                              |                                |                                |                               |
| 1+ Elevated, None High                      | 102<br>(69)                | 351 <sup>**</sup><br>(175)  | 1105<br>(620)                | 5918 <sup>**</sup><br>(2315)   | 8599 <sup>**</sup><br>(3594)   | 2019<br>(1107)                |
| 1 High                                      | 44<br>(65)                 | 330 <sup>**</sup><br>(167)  | 1421 <sup>**</sup><br>(581)  | 8585 <sup>***</sup><br>(2134)  | 13519 <sup>***</sup><br>(3208) | 2918 <sup>***</sup><br>(1072) |
| 2 + High                                    | 94<br>(66)                 | 662 <sup>***</sup><br>(173) | 3578 <sup>***</sup><br>(690) | 15266 <sup>***</sup><br>(2085) | 21016 <sup>***</sup><br>(3407) | 4923 <sup>***</sup><br>(1066) |

See notes above.

**Supplemental Table 5.**  
**Sensitivity Analyses (Length of Follow-up): Differences in Annual Utilization/Cost between Less Favorable CVH and All Favorable**  
**(N = 158,306)**

| <i>Panel A: Utilizations</i>                          |                               |                               |                                 |                               |                                |                               |
|-------------------------------------------------------|-------------------------------|-------------------------------|---------------------------------|-------------------------------|--------------------------------|-------------------------------|
|                                                       | Acute Inpatient Admission     | Length of Stay                | Post-acute Inpatient Admissions | Length of Stay                | Ambulatory Care                | Home Health                   |
|                                                       | No. of Admission              | Length of Stay                | No. of Admission                | Length of Stay                | No. of Visits                  | No. of Visits                 |
| All Favorable (ref. mean)                             | 0.19                          | 0.91                          | 0.04                            | 0.97                          | 14.57                          | 1.4                           |
| <b>Marginal effect from ref.; Mean [SE]</b>           |                               |                               |                                 |                               |                                |                               |
| 1+ Elevated, None High                                | 0.04 <sup>***</sup><br>(0.01) | 0.29 <sup>***</sup><br>(0.09) | 0.006 <sup>**</sup><br>(0.003)  | 0.14<br>(0.12)                | 0.80<br>(0.45)                 | 0.55 <sup>**</sup><br>(0.24)  |
| 1 High                                                | 0.09 <sup>***</sup><br>(0.01) | 0.63 <sup>***</sup><br>(0.09) | 0.011 <sup>***</sup><br>(0.003) | 0.30 <sup>***</sup><br>(0.12) | 1.40 <sup>***</sup><br>(0.44)  | 0.92 <sup>***</sup><br>(0.22) |
| 2 + High                                              | 0.15 <sup>***</sup><br>(0.01) | 1.04 <sup>***</sup><br>(0.09) | 0.021 <sup>***</sup><br>(0.003) | 0.59 <sup>***</sup><br>(0.12) | 3.04 <sup>***</sup><br>(0.45)  | 1.75 <sup>***</sup><br>(0.22) |
| <i>Controlled for length of Follow-up in Medicare</i> | <i>Yes</i>                    | <i>Yes</i>                    | <i>Yes</i>                      | <i>Yes</i>                    | <i>Yes</i>                     | <i>Yes</i>                    |
| <i>Panel B: Total Costs</i>                           |                               |                               |                                 |                               |                                |                               |
|                                                       | Q25                           | Q50                           | Q75                             | Q90                           | Q95                            | Mean                          |
| All Favorable (ref., \$)                              | 416                           | 1,548                         | 4,844                           | 16,962                        | 35,084                         | 6,903                         |
| <b>Marginal effect from ref.; Mean [SE]</b>           |                               |                               |                                 |                               |                                |                               |
| 1+ Elevated, None High                                | 86 <sup>***</sup><br>(29)     | 199 <sup>***</sup><br>(68)    | 358 <sup>*</sup><br>(185)       | 1274<br>(824)                 | 3980 <sup>***</sup><br>(1334)  | 1156 <sup>***</sup><br>(440)  |
| 1 High                                                | 80 <sup>***</sup><br>(28)     | 279 <sup>***</sup><br>(66)    | 881 <sup>***</sup><br>(187)     | 4424 <sup>***</sup><br>(859)  | 10203 <sup>***</sup><br>(1241) | 2428 <sup>***</sup><br>(425)  |
| 2 + High                                              | 160 <sup>***</sup><br>(29)    | 635 <sup>***</sup><br>(74)    | 3004 <sup>***</sup><br>(240)    | 13100 <sup>***</sup><br>(994) | 21572 <sup>***</sup><br>(1388) | 4628 <sup>***</sup><br>(428)  |
| <i>Controlled for length of Follow-up in Medicare</i> | <i>Yes</i>                    | <i>Yes</i>                    | <i>Yes</i>                      | <i>Yes</i>                    | <i>Yes</i>                     | <i>Yes</i>                    |

Notes: Coefficients and cluster-robust standard errors (in parenthesis) are reported in cells. The sample size for each regression is 158,306. All regressions also control for the length of follow-up in Medicare, state of residence, year, baseline age, race, sex, baseline education, and whether the participant died during the year. \*\* p<0.05; \*\*\* p<0.01

| <b>Supplemental Table 6.</b>                                                                                  |                                  |                              |                             |                                      |         |
|---------------------------------------------------------------------------------------------------------------|----------------------------------|------------------------------|-----------------------------|--------------------------------------|---------|
| <b>At Medicare Follow-up: Percent Distribution of Cardiovascular Risk Factors by CVH Strata</b>               |                                  |                              |                             |                                      |         |
|                                                                                                               | Hypertension<br>(ICD-9-CM = 401) | Diabetes<br>(ICD-9-CM = 250) | Obesity<br>(ICD-9-CM = 278) | Hyperlipidemia<br>(ICD-9-CM = 272.4) | Smoking |
| All Favorable<br>(% of stratum)                                                                               | 40.5%                            | 8.0%                         | 1.4%                        | 20.1%                                | N/A     |
| 1+ Elevated,<br>None High<br>(% of Stratum)                                                                   | 49.0%                            | 14.0%                        | 1.9%                        | 26.5%                                | N/A     |
| 1 High<br>(% of stratum)                                                                                      | 55.6%                            | 17.2%                        | 2.1%                        | 24.9%                                | N/A     |
| 2+ High<br>(% of stratum)                                                                                     | 60.8%                            | 25.2%                        | 3.6%                        | 25.5%                                | N/A     |
| P-value                                                                                                       | <0.01                            | <0.01                        | <0.01                       | <0.01                                |         |
| Notes: P-values are obtained from Wald tests for the equality of the sample means among the four risk strata. |                                  |                              |                             |                                      |         |



**Supplemental Table 7.**  
**Sensitivity Analyses (HMO): Differences in Annual Utilization/Cost between Less Favorable CVH and All Favorable**  
**(N = 158,306)**

| <i>Panel A: Utilizations</i>                        |                               |                               |                                 |                                |                                |                               |
|-----------------------------------------------------|-------------------------------|-------------------------------|---------------------------------|--------------------------------|--------------------------------|-------------------------------|
|                                                     | Acute Inpatient Admission     |                               | Post-acute Inpatient Admissions |                                | Ambulatory Care                | Home Health                   |
|                                                     | No. of Admission              | Length of Stay                | No. of Admission                | Length of Stay                 | No. of Visits                  | No. of Visits                 |
| All Favorable (ref. mean)                           | 0.19                          | 0.91                          | 0.04                            | 0.97                           | 14.57                          | 1.4                           |
| <b>Marginal effect from ref.; Mean [SE]</b>         |                               |                               |                                 |                                |                                |                               |
| 1+ Elevated, None High                              | 0.04 <sup>***</sup><br>(0.02) | 0.28 <sup>***</sup><br>(0.11) | 0.005<br>(0.003)                | 0.20<br>(0.13)                 | 0.80<br>(0.47)                 | 0.55 <sup>**</sup><br>(0.26)  |
| 1 High                                              | 0.09 <sup>***</sup><br>(0.01) | 0.64 <sup>***</sup><br>(0.10) | 0.011 <sup>***</sup><br>(0.003) | 0.35 <sup>***</sup><br>(0.12)  | 1.42 <sup>***</sup><br>(0.45)  | 0.93 <sup>***</sup><br>(0.24) |
| 2 + High                                            | 0.16 <sup>***</sup><br>(0.01) | 1.04 <sup>***</sup><br>(0.10) | 0.020 <sup>***</sup><br>(0.003) | 0.65 <sup>***</sup><br>(0.13)  | 3.07 <sup>***</sup><br>(0.46)  | 1.76 <sup>***</sup><br>(0.26) |
| <i>Controlled for Switching between HMO and FFS</i> | <i>Yes</i>                    | <i>Yes</i>                    | <i>Yes</i>                      | <i>Yes</i>                     | <i>Yes</i>                     | <i>Yes</i>                    |
| <i>Panel B: Total Costs</i>                         |                               |                               |                                 |                                |                                |                               |
|                                                     | Q25                           | Q50                           | Q75                             | Q90                            | Q95                            | Mean                          |
| All Favorable (ref., \$)                            | 416                           | 1,548                         | 4,844                           | 16,962                         | 35,084                         | 6,903                         |
| <b>Marginal effect from ref.; Mean [SE]</b>         |                               |                               |                                 |                                |                                |                               |
| 1+ Elevated, None High                              | 106 <sup>***</sup><br>(37)    | 198 <sup>**</sup><br>(83)     | 371<br>(239)                    | 1109<br>(1082)                 | 4155 <sup>**</sup><br>(1950)   | 1060 <sup>**</sup><br>(481)   |
| 1 High                                              | 92 <sup>***</sup><br>(32)     | 261 <sup>***</sup><br>(74)    | 828 <sup>***</sup><br>(218)     | 4403 <sup>***</sup><br>(1009)  | 10653 <sup>***</sup><br>(1750) | 2439 <sup>***</sup><br>(452)  |
| 2 + High                                            | 174 <sup>***</sup><br>(34)    | 604 <sup>***</sup><br>(81)    | 2921 <sup>***</sup><br>(279)    | 13016 <sup>***</sup><br>(1249) | 22131 <sup>***</sup><br>(2078) | 4622 <sup>***</sup><br>(472)  |
| <i>Controlled for Switching between HMO and FFS</i> | <i>Yes</i>                    | <i>Yes</i>                    | <i>Yes</i>                      | <i>Yes</i>                     | <i>Yes</i>                     | <i>Yes</i>                    |

Notes: Coefficients and cluster-robust standard errors (in parenthesis) are reported in cells. The sample size for each regression is 158,306. All regressions also control for fraction switched from FFS to HMO, fraction switched from HMO to FFS, and fraction remained in HMO in addition to age at follow-up, state of residence, year, baseline age, race, sex, baseline education, and whether the participant died during the year. \*\* p<0.05; \*\*\* p<0.01
